# Supplementary material for: Diagnostic outcomes of robotic-assisted bronchoscopy for pulmonary lesions in a real-world multicenter community setting
Source: PubMed Central journal article supplement (PMC10170714; doi:10.1186/s12890-023-02465-w), 2023-05-09
Supplement: 12890_2023_2465_MOESM1_ESM.pdf [file 12890_2023_2465_MOESM1_ESM.pdf]

**Additional File Table 1 – Classification of index pathology results as malignant, benign specific, benign non-specific, and non-diagnostic**

| Positive for Malignancy at Index                           |                                | Negative for Malignancy at Index |                                                     |
|------------------------------------------------------------|--------------------------------|----------------------------------|-----------------------------------------------------|
| Malignant                                                  | Benign Specific                | Benign Non-Specific              | Non-Diagnostic                                      |
| Non-small cell lung cancer                                 | Infection / abscess            | Inflammation                     | Normal lung tissue                                  |
| Adenocarcinoma                                             | Bacterial                      | Acute/benign inflammation        | Bronchial epithelium                                |
| Adenocarcinoma in situ                                     | Fungal                         | Chronic inflammation             | Hemorrhage                                          |
| Squamous cell carcinoma                                    | Viral                          | Inflammatory tissue              | Macrophages                                         |
| Large cell carcinoma                                       | Granuloma                      | Neutrophilic inflammation        | Blood clots                                         |
| Large cell neuroendocrine carcinoma                        | Granulomatous inflammation     | Lymphocytes                      | Focally anthracotic alveolated pulmonary parenchyma |
| Adenosquamous carcinoma                                    | Necrotizing (caseating)        | Organizing pneumonia             | Benign tissue                                       |
| Sarcomatoid carcinoma                                      | Non-necrotizing                | Multinucleated giant cell(s)     | Reactive bronchial cells                            |
| Small cell carcinoma                                       | Hamartoma                      | Squamous dysplasia/ metaplasia   | Atypical cells <sup>a</sup>                         |
| Small cell carcinoma (oat cell cancer)                     | Benign metastasizing leiomyoma | Radiotherapy changes             |                                                     |
| Combined small cell carcinoma                              |                                | Asbestos fibrosis                |                                                     |
| Neuroendocrine carcinoma                                   |                                | Iron pill aspiration             |                                                     |
| Other types of lung tumors                                 |                                | Fibroelastic scar                |                                                     |
| Mesothelioma                                               |                                | Interstitial lung disease        |                                                     |
| Adenoid cystic carcinoma of the lung                       |                                | Bronchogenic cyst                |                                                     |
| Lung sarcomas                                              |                                |                                  |                                                     |
| Lymphomas                                                  |                                |                                  |                                                     |
| Germ cell tumors                                           |                                |                                  |                                                     |
| Teratomas                                                  |                                |                                  |                                                     |
| Thymomas and thymic carcinoma                              |                                |                                  |                                                     |
| Other malignant cells (unable to characterize)             |                                |                                  |                                                     |
| Metastatic carcinoma                                       |                                |                                  |                                                     |
| From a hematological origin                                |                                |                                  |                                                     |
| Solid tumor origin                                         |                                |                                  |                                                     |
| Other - deemed malignant based on multidisciplinary review |                                |                                  |                                                     |

<sup>a</sup>Insufficient evidence for malignant diagnosis
