# Supplementary material for: Diagnostic outcomes of robotic-assisted bronchoscopy for pulmonary lesions in a real-world multicenter community setting
Source: PubMed Central journal article supplement (PMC10170714; doi:10.1186/s12890-023-02465-w), 2023-05-09
Supplement: 12890_2023_2465_MOESM2_ESM.pdf [file 12890_2023_2465_MOESM2_ESM.pdf]

**Additional File Table 2 – Secondary Lesion Characteristics**

| <b>Lesion Characteristic</b>             | <b>Total (N=48)</b>          |
|------------------------------------------|------------------------------|
| Lesion size <sup>a</sup> , mm            | 15.5 (5.5–53.5) <sup>b</sup> |
| Lesion size <sup>a</sup> <20 mm          | 30/47 (63.8%)                |
| Location                                 |                              |
| Proximal third                           | 9/47 (19.2%)                 |
| Middle                                   | 14/47 (29.8%)                |
| Peripheral (outer third of the lung)     | 24/47 (51.1%)                |
| Distance from closest edge to pleura, mm | 18.5 (0.0–91.0) <sup>c</sup> |
| Lesion lobe location                     |                              |
| Right upper lobe                         | 15/47 (31.9%)                |
| Right middle lobe                        | 5/47 (10.6%)                 |
| Right lower lobe                         | 12/47 (25.5%)                |
| Left upper lobe                          | 10/47 (21.3%)                |
| Left lower lobe                          | 5/47 (10.6%)                 |
| Visible bronchus leading to lung lesion  | 20/47 (42.6%)                |
| Nodule type                              |                              |
| Solid                                    | 25/47 (53.2%)                |
| Subsolid                                 | 22/47 (46.8%)                |
| Pure ground glass (non-solid)            | 6 (27.3%)                    |
| Semi-solid                               | 16 (72.7%)                   |
| Margin specifications                    |                              |
| Spiculated                               | 17/42 (40.5%)                |
| Smooth                                   | 9/42 (21.4%)                 |
| Lobulated                                | 16/42 (38.1%)                |
| Calcification                            | 0/47 (0%)                    |

---

Results are displayed n (%) or median (minimum–maximum)

<sup>a</sup>Size was calculated as the mean of the long and short axes dimensions when both were reported and as the long axis dimension otherwise

<sup>b</sup>Based on 47 non-missing values

<sup>c</sup>Based on 44 non-missing values
