# Supplementary material for: Diagnostic outcomes of robotic-assisted bronchoscopy for pulmonary lesions in a real-world multicenter community setting
Source: PubMed Central journal article supplement (PMC10170714; doi:10.1186/s12890-023-02465-w), 2023-05-09
Supplement: 12890_2023_2465_MOESM3_ESM.pdf [file 12890_2023_2465_MOESM3_ESM.pdf]

**Additional File Table 3 – Patient, Lesion, and Procedural Detail by Operators’ Medical Specialty**

|                                      | <b>Interventional Pulmonology<br/>(N=226)</b> | <b>Thoracic Surgery<br/>(N=38)</b> | <b>P-Value</b> |
|--------------------------------------|-----------------------------------------------|------------------------------------|----------------|
| <b>Study site detail</b>             |                                               |                                    |                |
| Setting                              |                                               |                                    |                |
| Inpatient                            | 15 (6.6%)                                     | 2 (5.3%)                           | 1.0000         |
| Outpatient                           | 211 (93.4)                                    | 36 (94.7)                          |                |
| <b>Patient Characteristics</b>       |                                               |                                    |                |
| Emphysema                            |                                               |                                    |                |
| No                                   | 122 (54.0%)                                   | 28 (73.7%)                         | 0.0327         |
| Yes                                  | 104 (46.0%)                                   | 10 (26.3%)                         |                |
| COPD                                 |                                               |                                    |                |
| No                                   | 108 (47.8%)                                   | 20 (52.6%)                         | 0.6030         |
| Yes                                  | 118 (52.2%)                                   | 18 (47.4%)                         |                |
| Prior lung surgery                   |                                               |                                    |                |
| No                                   | 205 (90.7%)                                   | 30 (78.9%)                         | 0.0463         |
| Yes                                  | 21 (9.3%)                                     | 8 (21.1%)                          |                |
| <b>Lesion detail</b>                 |                                               |                                    |                |
| Primary lesion solidity              |                                               |                                    |                |
| Subsolid                             | 43 (19.0%)                                    | 16 (42.1%)                         | 0.0029         |
| Solid                                | 183 (81.0%)                                   | 22 (57.9%)                         |                |
| Primary lesion location              |                                               |                                    |                |
| Proximal third                       | 17 (7.6%)                                     | 10 (26.3%)                         | 0.0050         |
| Middle                               | 72 (32.0%)                                    | 9 (23.7%)                          |                |
| Peripheral (outer third of the lung) | 136 (60.4%)                                   | 19 (50.0%)                         |                |
| Primary lesion bronchus sign         |                                               |                                    |                |
| No                                   | 159 (71.9%)                                   | 22 (57.9%)                         | 0.0878         |
| Yes                                  | 62 (28.1%)                                    | 16 (42.1%)                         |                |

|                                         |             |            |         |  |
|-----------------------------------------|-------------|------------|---------|--|
| Lesions at the pleura                   |             |            |         |  |
| No                                      | 123 (71.5%) | 30 (78.9%) | 0.4234  |  |
| Yes                                     | 49 (28.5%)  | 8 (21.1%)  |         |  |
| Primary lesion size <sup>a</sup> <20 mm |             |            |         |  |
| No                                      | 105 (46.5%) | 22 (57.9%) | 0.2211  |  |
| Yes                                     | 121 (53.5%) | 16 (42.1%) |         |  |
| <b>Procedural details</b>               |             |            |         |  |
| ROSE used                               |             |            |         |  |
| No                                      | 62 (27.4%)  | 30 (78.9%) | <0.0001 |  |
| Yes                                     | 164 (72.6%) | 8 (21.1%)  |         |  |
| Monarch Platform software version       |             |            |         |  |
| ≤2.1.4                                  | 81 (35.8%)  | 27 (71.1%) | <0.0001 |  |
| >2.1.4                                  | 145 (64.2%) | 11 (28.9%) |         |  |

COPD, chronic obstructive pulmonary disease; ROSE, rapid onsite evaluation

<sup>a</sup>Size was calculated as the mean of the long and short axes dimensions when both were reported and as the long axis dimension otherwise
